# Supplementary material for: Fe(CN)63− ions confined into porous pillared-carbon nanosheets for high energy density supercapacitors
Source: Royal Society of Chemistry journal article supplement (doi:10.1039/c8ta08201d), 2018-01-01
Supplement: c8ta08201d1.pdf [file c8ta08201d1.pdf]

## Supporting Information

### **Fe(CN)<sub>6</sub><sup>3-</sup> ions confined into pillared-porous carbon nanosheets for high energy density supercapacitors**

*Qihang Zhou,<sup>a</sup> Zheng Liu,<sup>a</sup> Tong Wei,<sup>\*a</sup> Lizhi Sheng,<sup>a</sup> Yuting Jiang,<sup>a</sup> Zimu Jiang,<sup>a</sup> and  
Zhuangjun Fan<sup>\* ab</sup>*

*a. Key Laboratory of Superlight Materials and Surface Technology, Ministry of  
Education, College of Material Science and Chemical Engineering, Harbin  
Engineering University, Harbin 150001, China*

*b. School of Material Science and Engineering, China University of Petroleum,  
Qingdao 266580, China*

\*Corresponding author. Tel: +86 451 82569890.

E-mail: weitong666@163.com; fanzhj666@163.com

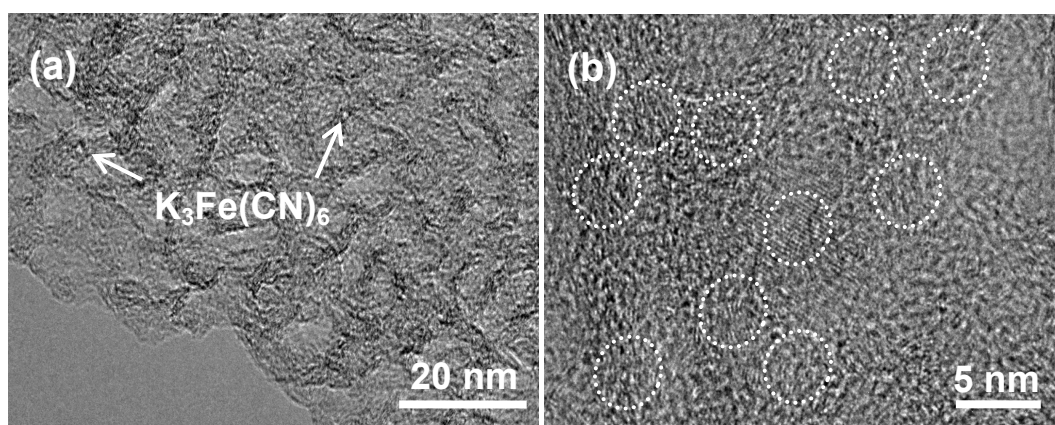

**Figure S1.** (a, b) TEM images of the F-OPPCNs.

**Table S1.** Pore characteristics of the PPCNs and OPPCNs.

| Sample | $S_{\text{BET}}$ ( $\text{m}^2 \text{g}^{-1}$ ) | $S_{\text{meso}}$ ( $\text{m}^2 \text{g}^{-1}$ ) | $V_{\text{total}}$ ( $\text{cm}^3 \text{g}^{-1}$ ) | $V_{\text{meso}}$ ( $\text{cm}^3 \text{g}^{-1}$ ) | $V_{\text{meso}}/V_{\text{total}}$ |
|--------|-------------------------------------------------|--------------------------------------------------|----------------------------------------------------|---------------------------------------------------|------------------------------------|
| PPCNs  | 843                                             | 814                                              | 2.179                                              | 2.118                                             | 97.20%                             |
| OPPCNs | 772                                             | 770                                              | 2.043                                              | 1.997                                             | 97.75%                             |

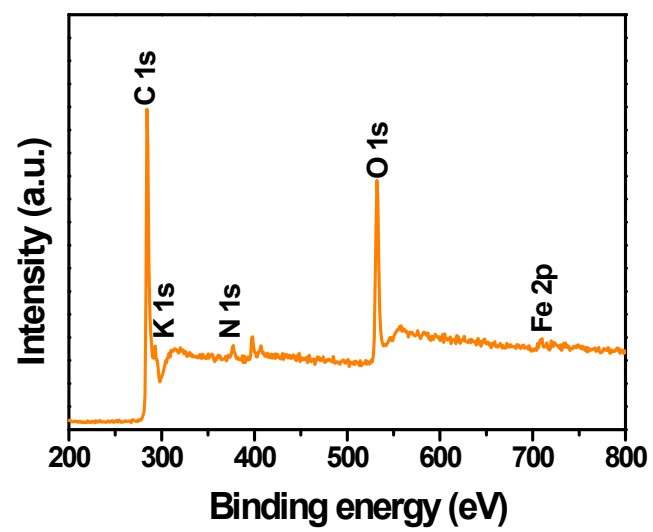

Figure S2. XPS spectra of the F-OPPCNs.

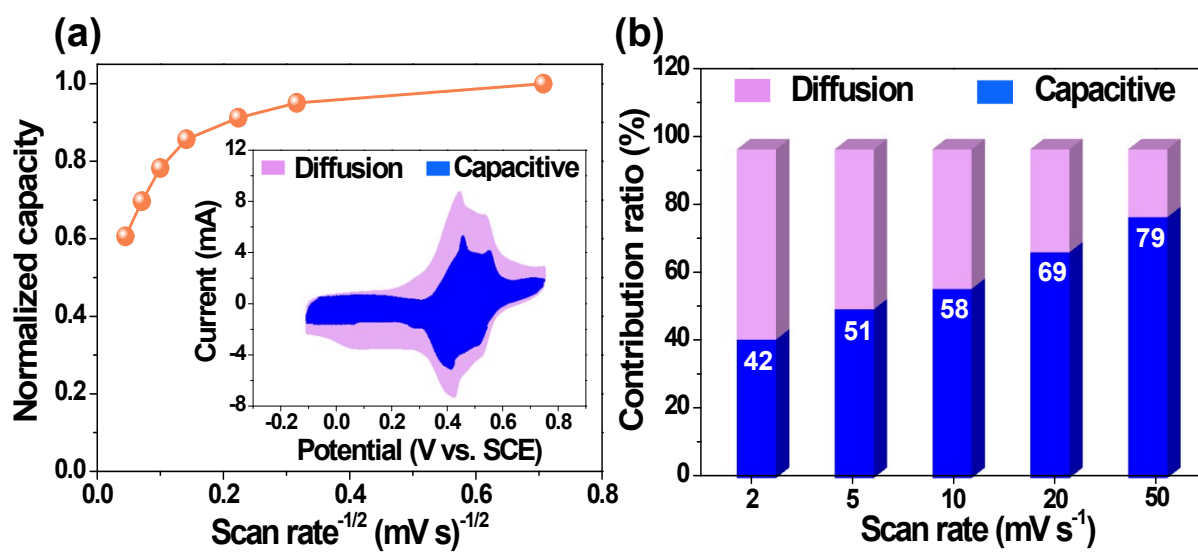

**Figure S3.** (a) The normalized capacity versus  $\nu^{-1/2}$  (inset: separation of the capacitive (blue) and diffusion currents (purple) at a scan rate of 10 mV s<sup>-1</sup>). (b) Capacitive ratio of the F-OPPCNs at different scan rates.

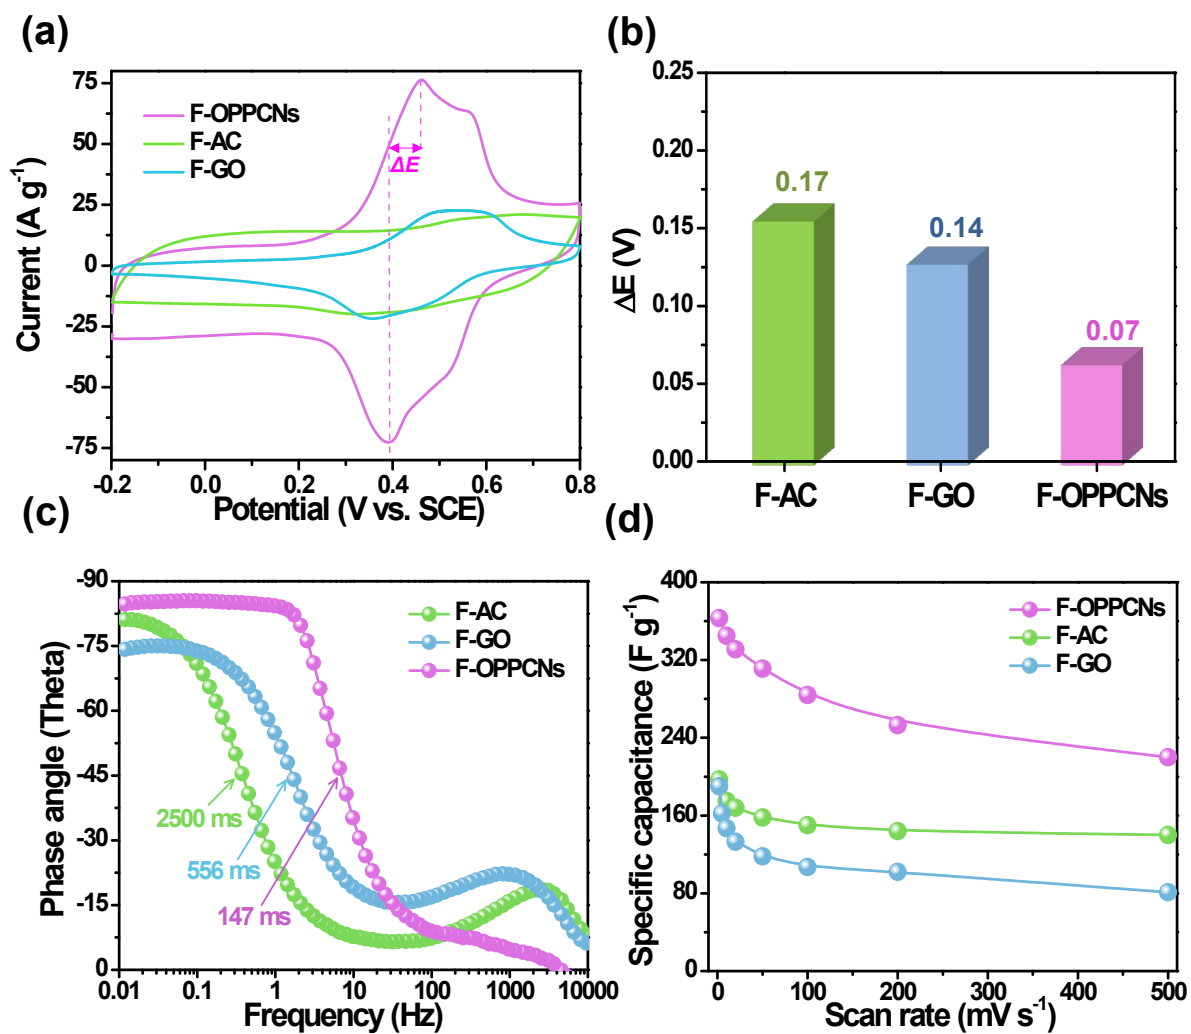

**Figure S4.** (a) CV curves at  $100 \text{ mV s}^{-1}$  and (b) peak separation average values ( $\Delta E$ ) of the F-OPPCNs, F-AC and F-GO electrodes. (c) Bode plots of phase angle versus frequency. (d) Specific capacitances of the as-prepared electrodes.

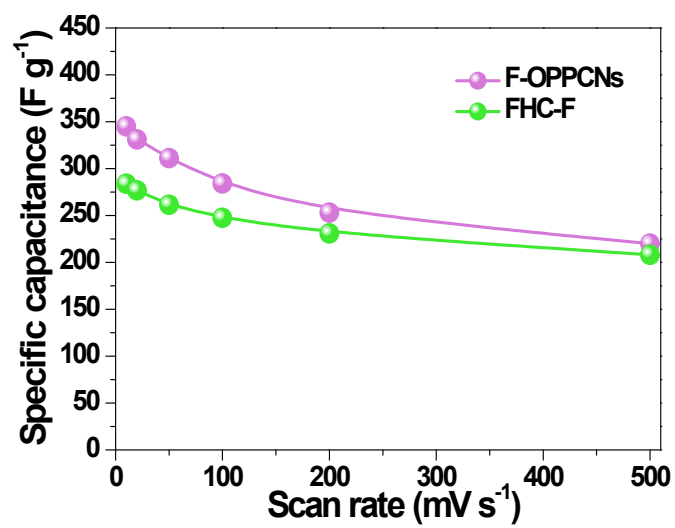

Figure S5. The specific capacitance of the F-OPPCNs and FHC-F.

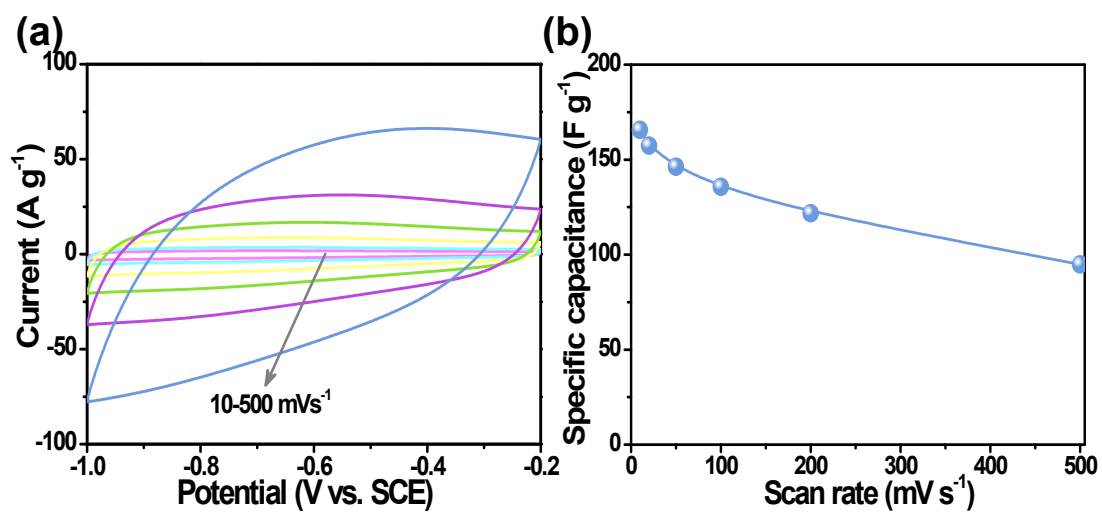

**Figure S6.** Electrochemical performances of the SGC electrode measured in 1 M Na<sub>2</sub>SO<sub>4</sub> electrolyte within a potential window of -1 to -0.2 V (vs SCE). (a) CV curves of SGC at various scan rates from 10 to 500 mV s<sup>-1</sup> and (b) the corresponding specific capacitances.



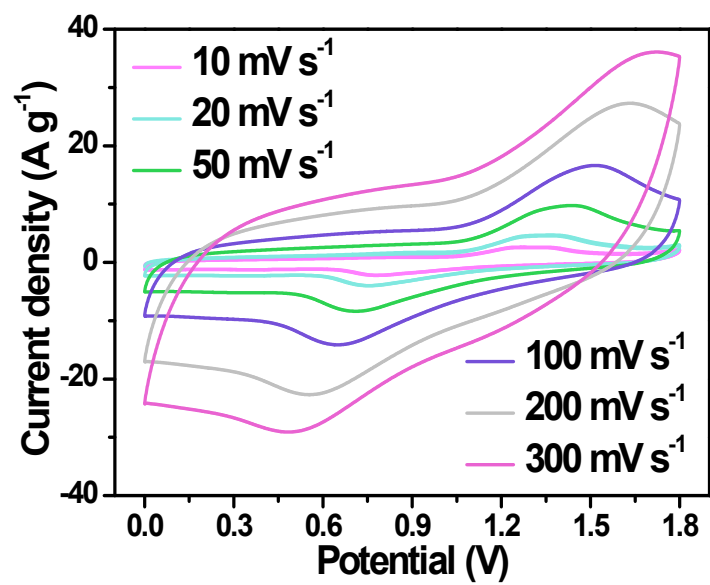

Figure S7. CV curves of the SGC//F-OPPCN supercapacitor at different scan rates.

**Table S2.** Comparison of the performances for previously reported ASCs.

| Electrode materials                                     |                                   | Voltage (V) | Electrolyte                         | Energy density<br>(Wh kg <sup>-1</sup> ) | Power density<br>(W kg <sup>-1</sup> ) | Ref.             |
|---------------------------------------------------------|-----------------------------------|-------------|-------------------------------------|------------------------------------------|----------------------------------------|------------------|
| positive electrode                                      | negative electrode                |             |                                     |                                          |                                        |                  |
| Co <sub>3</sub> O <sub>4</sub> nanorods                 | G-16/P-C                          | 1.6         | 6 M KOH                             | 50.1                                     | 400                                    | 1                |
| Ni <sub>0.32</sub> Co <sub>0.68</sub> (OH) <sub>2</sub> | rGO                               | 1.6         | 1 M NaOH                            | 24                                       | 1000                                   | 2                |
| α-Ni(OH) <sub>2</sub> /rGO                              | rGO                               | 1.6         | 1 M KOH                             | 42                                       | 400                                    | 3                |
| MnO <sub>2</sub> nanosheets on Ni foam                  | exfoliated GO                     | 1.6         | 1 M KOH                             | 25.8                                     | 200                                    | 4                |
| nickel cobaltite-C                                      | AC                                | 1.6         | 6 M KOH                             | 36                                       | 852                                    | 5                |
| Ni <sub>3</sub> (VO <sub>4</sub> ) <sub>2</sub>         | AC                                | 1.6         | 6 M KOH                             | 25.3                                     | 240                                    | 6                |
| RGO-nickel foam                                         | AC                                | 1.6         | 6 M KOH                             | 38.6                                     | 69.5                                   | 7                |
| NiCo-S/Ni foam                                          | nitrogen-doped graphene           | 1.6         | 2 M KOH                             | 58.1                                     | 796                                    | 8                |
| Ni-Co-Mn-OH/rGO                                         | PPD/rGO                           | 1.6         | 2 M KOH                             | 74.7                                     | 1680                                   | 9                |
| MnO <sub>2</sub> /C                                     | CNT/V <sub>2</sub> O <sub>5</sub> | 1.6         | 1 M Na <sub>2</sub> SO <sub>4</sub> | 75                                       | 16                                     | 10               |
| MnO <sub>2</sub> nanowire/graphene                      | graphene                          | 2           | 1 M Na <sub>2</sub> SO <sub>4</sub> | 30.4                                     | 100                                    | 11               |
| MnO <sub>2</sub> /GO                                    | carbon                            | 2           | 1 M Na <sub>2</sub> SO <sub>4</sub> | 46.7                                     | 100                                    | 12               |
| silicon diatom@MnO <sub>2</sub>                         | active GO                         | 1.6         | 1 M Na <sub>2</sub> SO <sub>4</sub> | 23.2                                     | 102                                    | 13               |
| MnO <sub>2</sub> /3D-NRGO                               | 3D-NRGO                           | 2           | 1 M Na <sub>2</sub> SO <sub>4</sub> | 35.3                                     | 200                                    | 14               |
| RGO/MnO <sub>2</sub>                                    | RGO/MoO <sub>3</sub>              | 2           | 1 M Na <sub>2</sub> SO <sub>4</sub> | 42.6                                     | 276                                    | 15               |
| MnO <sub>2</sub>                                        | PPy                               | 1.7         | 1 M Na <sub>2</sub> SO <sub>4</sub> | 27.2                                     | 850                                    | 16               |
| F-OPPCNs                                                | SGC                               | 1.8         | 1 M Na <sub>2</sub> SO <sub>4</sub> | 48                                       | 960                                    | <b>This work</b> |

-0.818  0.818

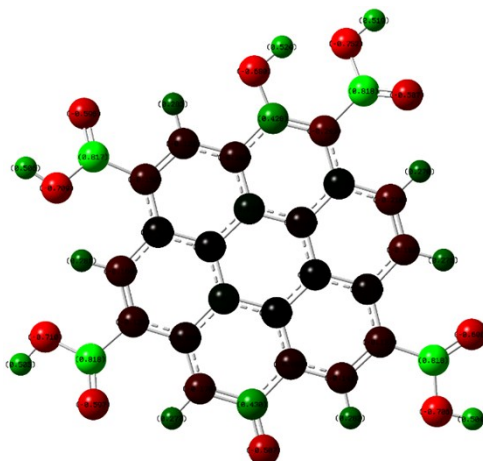

**Figure S8.** The charge distribution and XYZ coordinate of the optimized structure of OPPCNs.

Standard orientation:

| Center Number | Atomic Number | Atomic Type | Coordinates (Angstroms) |           |          |
|---------------|---------------|-------------|-------------------------|-----------|----------|
|               |               |             | X                       | Y         | Z        |
| 1             | 6             | 0           | -3.822328               | 0.000000  | 0.000000 |
| 2             | 6             | 0           | -3.131864               | -1.211940 | 0.000000 |
| 3             | 6             | 0           | -1.730112               | -1.238243 | 0.000000 |
| 4             | 6             | 0           | -1.011093               | 0.000000  | 0.000000 |
| 5             | 6             | 0           | -1.730112               | 1.238243  | 0.000000 |
| 6             | 6             | 0           | -3.131864               | 1.211940  | 0.000000 |
| 7             | 6             | 0           | -0.985825               | -2.470535 | 0.000000 |
| 8             | 6             | 0           | 0.409496                | 0.000000  | 0.000000 |
| 9             | 6             | 0           | 1.129068                | -1.247459 | 0.000000 |
| 10            | 6             | 0           | 0.372757                | -2.476245 | 0.000000 |
| 11            | 6             | 0           | 2.515932                | -1.235477 | 0.000000 |
| 12            | 1             | 0           | 3.086444                | -2.160019 | 0.000000 |
| 13            | 6             | 0           | 3.267247                | 0.000000  | 0.000000 |
| 14            | 6             | 0           | 2.515932                | 1.235477  | 0.000000 |
| 15            | 6             | 0           | 1.129068                | 1.247459  | 0.000000 |
| 16            | 6             | 0           | 0.372757                | 2.476245  | 0.000000 |
| 17            | 6             | 0           | -0.985825               | 2.470535  | 0.000000 |
| 18            | 1             | 0           | -1.540479               | 3.405589  | 0.000000 |
| 19            | 1             | 0           | 0.922269                | 3.413892  | 0.000000 |
| 20            | 1             | 0           | -1.540479               | -3.405589 | 0.000000 |
| 21            | 1             | 0           | -4.908827               | 0.000000  | 0.000000 |
| 22            | 1             | 0           | -3.679459               | -2.151000 | 0.000000 |
| 23            | 1             | 0           | -3.679459               | 2.151000  | 0.000000 |
| 24            | 1             | 0           | 0.922269                | -3.413892 | 0.000000 |
| 25            | 1             | 0           | 3.086444                | 2.160019  | 0.000000 |
| 26            | 8             | 0           | 4.528983                | 0.000000  | 0.000000 |

-0.499

0.499

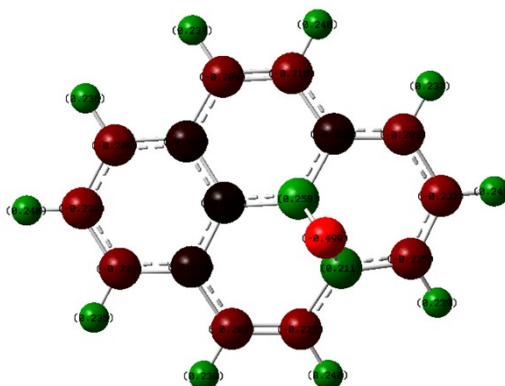

**Figure S9.** The charge distribution and XYZ coordinate of the optimized structure of carbon with epoxide group (O-C-O).

Standard orientation:

| Center Number | Atomic Number | Atomic Type | Coordinates (Angstroms) |           |           |
|---------------|---------------|-------------|-------------------------|-----------|-----------|
|               |               |             | X                       | Y         | Z         |
| 1             | 6             | 0           | -3.610917               | -0.076573 | -0.132153 |
| 2             | 6             | 0           | -2.966755               | 1.159062  | -0.121287 |
| 3             | 6             | 0           | -1.567048               | 1.234100  | -0.024107 |
| 4             | 6             | 0           | -0.829074               | 0.032766  | 0.090002  |
| 5             | 6             | 0           | -1.470007               | -1.225435 | 0.005634  |
| 6             | 6             | 0           | -2.871773               | -1.257869 | -0.088107 |
| 7             | 6             | 0           | -0.856887               | 2.500617  | -0.050908 |
| 8             | 6             | 0           | 0.620766                | 0.111931  | 0.285046  |
| 9             | 6             | 0           | 1.316745                | 1.380656  | 0.026484  |
| 10            | 6             | 0           | 0.499996                | 2.566473  | -0.056076 |
| 11            | 6             | 0           | 2.682384                | 1.372580  | -0.139237 |
| 12            | 6             | 0           | 3.204106                | 2.321107  | -0.245426 |
| 13            | 1             | 0           | 3.416659                | 0.165889  | -0.369063 |
| 14            | 6             | 0           | 2.826442                | -1.064276 | -0.380196 |
| 15            | 6             | 0           | 1.461977                | -1.244902 | 0.092335  |
| 16            | 6             | 0           | 0.669671                | -2.444044 | -0.226186 |
| 17            | 6             | 0           | -0.678661               | -2.437850 | -0.161087 |
| 18            | 1             | 0           | -1.227328               | -3.357468 | -0.352600 |
| 19            | 1             | 0           | 1.206147                | -3.342797 | -0.521302 |
| 20            | 1             | 0           | -1.447259               | 3.411112  | -0.116495 |
| 21            | 1             | 0           | -4.694398               | -0.120274 | -0.201362 |
| 22            | 1             | 0           | -3.544471               | 2.077466  | -0.191306 |
| 23            | 1             | 0           | -3.377050               | -2.218572 | -0.150567 |
| 24            | 1             | 0           | 1.002765                | 3.527533  | -0.136389 |
| 25            | 1             | 0           | 3.343663                | -1.925331 | -0.796608 |
| 26            | 1             | 0           | 4.457882                | 0.257288  | -0.668375 |
| 27            | 8             | 0           | 1.151854                | -0.658602 | 1.359235  |

-0.409   0.409

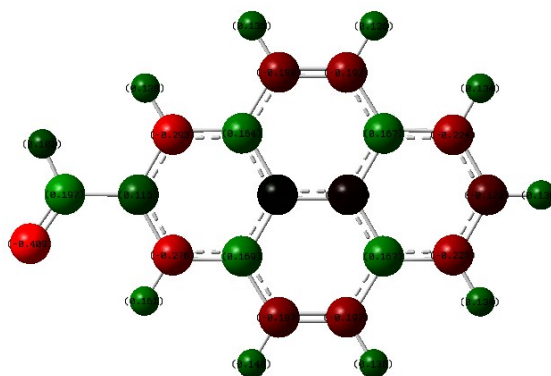

**Figure S10.** The charge distribution and XYZ coordinate of the optimized structure of carbon with aldehyde group (C=O).

Standard orientation:

| Center Number | Atomic Number | Atomic Type | Coordinates (Angstroms) |           |           |
|---------------|---------------|-------------|-------------------------|-----------|-----------|
|               |               |             | X                       | Y         | Z         |
| 1             | 6             | 0           | 4.154793                | -0.193617 | -0.000011 |
| 2             | 6             | 0           | 3.391863                | -1.360933 | -0.000006 |
| 3             | 6             | 0           | 1.989895                | -1.301865 | 0.000000  |
| 4             | 6             | 0           | 1.350813                | -0.023683 | 0.000000  |
| 5             | 6             | 0           | 2.139900                | 1.167496  | -0.000005 |
| 6             | 6             | 0           | 3.539667                | 1.056784  | -0.000011 |
| 7             | 6             | 0           | 1.169542                | -2.483599 | 0.000006  |
| 8             | 6             | 0           | -0.071974               | 0.062368  | 0.000006  |
| 9             | 6             | 0           | -0.862120               | -1.131885 | 0.000012  |
| 10            | 6             | 0           | -0.188605               | -2.403771 | 0.000011  |
| 11            | 6             | 0           | -2.255997               | -1.025404 | 0.000019  |
| 12            | 1             | 0           | -2.881012               | -1.913954 | 0.000025  |
| 13            | 6             | 0           | -2.877561               | 0.230099  | 0.000017  |
| 14            | 6             | 0           | -2.109838               | 1.398943  | 0.000010  |
| 15            | 6             | 0           | -0.709511               | 1.341920  | 0.000006  |
| 16            | 6             | 0           | 0.110460                | 2.522826  | 0.000000  |
| 17            | 6             | 0           | 1.469174                | 2.438889  | -0.000005 |
| 18            | 1             | 0           | 2.075510                | 3.341389  | -0.000009 |
| 19            | 1             | 0           | -0.381524               | 3.492313  | 0.000000  |
| 20            | 1             | 0           | 1.662842                | -3.452487 | 0.000006  |
| 21            | 1             | 0           | 5.239332                | -0.259945 | -0.000015 |
| 22            | 1             | 0           | 3.881276                | -2.331720 | -0.000006 |
| 23            | 1             | 0           | 4.142636                | 1.961409  | -0.000015 |
| 24            | 1             | 0           | -0.794926               | -3.305903 | 0.000016  |
| 25            | 1             | 0           | -2.606389               | 2.367764  | 0.000008  |
| 26            | 6             | 0           | -4.354705               | 0.326797  | 0.000025  |
| 27            | 1             | 0           | -4.749701               | 1.367523  | 0.000101  |
| 28            | 8             | 0           | -5.112852               | -0.624320 | -0.000070 |

-0.607  0.607

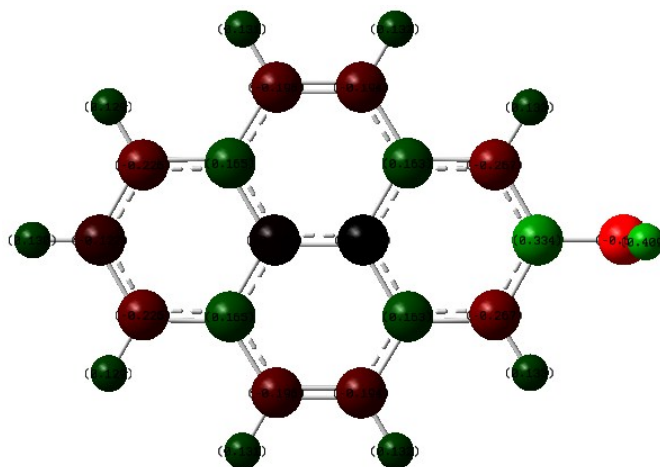

**Figure S11.** The charge distribution and XYZ coordinate of the optimized structure of carbon with hydroxy group (C-OH).

Standard orientation:

| Center Number | Atomic Number | Atomic Type | Coordinates (Angstroms) |           |           |
|---------------|---------------|-------------|-------------------------|-----------|-----------|
|               |               |             | X                       | Y         | Z         |
| 1             | 6             | 0           | -3.874813               | 0.000000  | 0.011980  |
| 2             | 6             | 0           | -3.183540               | -1.210485 | 0.008780  |
| 3             | 6             | 0           | -1.779783               | -1.236127 | 0.002800  |
| 4             | 6             | 0           | -1.063907               | 0.000000  | 0.000542  |
| 5             | 6             | 0           | -1.779783               | 1.236127  | 0.002800  |
| 6             | 6             | 0           | -3.183540               | 1.210485  | 0.008780  |
| 7             | 6             | 0           | -1.030575               | -2.463005 | -0.002469 |
| 8             | 6             | 0           | 0.362096                | 0.000000  | -0.004234 |
| 9             | 6             | 0           | 1.079204                | -1.235598 | -0.008918 |
| 10            | 6             | 0           | 0.330995                | -2.463607 | -0.008833 |
| 11            | 6             | 0           | 2.482197                | -1.212702 | -0.012133 |
| 12            | 1             | 0           | 3.048218                | -2.140035 | -0.025843 |
| 13            | 6             | 0           | 3.170237                | 0.000000  | -0.009698 |
| 14            | 6             | 0           | 2.482197                | 1.212702  | -0.012133 |
| 15            | 6             | 0           | 1.079204                | 1.235598  | -0.008918 |
| 16            | 6             | 0           | 0.330995                | 2.463607  | -0.008833 |
| 17            | 6             | 0           | -1.030575               | 2.463005  | -0.002469 |
| 18            | 1             | 0           | -1.579521               | 3.401772  | -0.002201 |
| 19            | 1             | 0           | 0.880418                | 3.401861  | -0.014310 |
| 20            | 1             | 0           | -1.579521               | -3.401772 | -0.002201 |
| 21            | 1             | 0           | -4.961448               | 0.000000  | 0.016316  |
| 22            | 1             | 0           | -3.730192               | -2.150491 | 0.010328  |
| 23            | 1             | 0           | -3.730192               | 2.150491  | 0.010328  |
| 24            | 1             | 0           | 0.880419                | -3.401861 | -0.014310 |
| 25            | 1             | 0           | 3.048218                | 2.140035  | -0.025843 |
| 26            | 8             | 0           | 4.558841                | 0.000000  | -0.066518 |
| 27            | 1             | 0           | 4.909214                | -0.000001 | 0.837619  |

-0.620 0.620

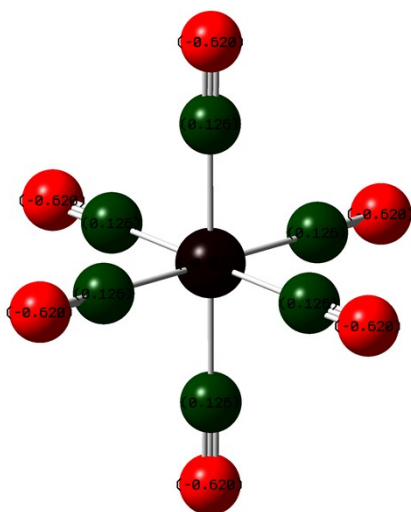

**Figure S12.** The charge distribution and XYZ coordinate of the optimized structure of  $K_3Fe(CN)_6$ .

Standard orientation:

| Center Number | Atomic Number | Atomic Type | Coordinates (Angstroms) |           |           |
|---------------|---------------|-------------|-------------------------|-----------|-----------|
|               |               |             | X                       | Y         | Z         |
| 1             | 26            | 0           | 0.000038                | -0.000034 | -0.000037 |
| 2             | 6             | 0           | 1.037983                | 1.276116  | -1.118326 |
| 3             | 6             | 0           | 1.623835                | -0.255865 | 1.119963  |
| 4             | 6             | 0           | 0.590745                | -1.539008 | -1.113288 |
| 5             | 6             | 0           | -1.623879               | 0.255856  | -1.119852 |
| 6             | 6             | 0           | -1.037981               | -1.276252 | 1.118139  |
| 7             | 6             | 0           | -0.590695               | 1.539179  | 1.113444  |
| 8             | 7             | 0           | -0.936207               | 2.439226  | 1.783406  |
| 9             | 7             | 0           | 2.573328                | -0.405290 | 1.794067  |
| 10            | 7             | 0           | 0.936310                | -2.438997 | -1.783271 |
| 11            | 7             | 0           | -1.645107               | -2.022209 | 1.791361  |
| 12            | 7             | 0           | -2.573435               | 0.405241  | -1.793876 |
| 13            | 7             | 0           | 1.644962                | 2.022132  | -1.791615 |

## Notes and references

- 1 D. Yu, K. Goh, L. Wei, H. Wang, Q. Zhang, W. Jiang, R. Si, Y. Chen, *J. Mater. Chem. A*. 2013, **1**, 11061–11069.
- 2 J. Chen, C. Hsu, C. Hu, *J. Power Sources*. 2014, **253**, 205–213.
- 3 S. Bag, C. Raj, *J. Mater. Chem. A*. 2014, **2**, 17848–17856.
- 4 M. Huang, X. Li, F. Li, L. Li, Y. Xin, *J. Power Sources*. 2015, **277**, 36–43.
- 5 Y. Lei, Y. Wang, W. Yang, H. Yuan, D. Xiao, *RSC Adv*. 2014, **5**, 7575–7583.
- 6 R. Kumar, P. Rai, A. Sharma, *J. Mater. Chem. A*. 2016, **4**, 9822–9831.
- 7 X. Bai, Q. Liu, H. Zhang, J. Liu, Z. Li, X. Jing, *Electrochim. Acta*. 2016, **215**, 492–499.
- 8 D. Zha, Y. Fu, L. Zhang, J. Zhu, X. Wang, *J. Power Sources*. 2018, **378**, 31–39.
- 9 B. Zhao, L. Zhang, Q. Zhang, D. Chen, Y. Cheng, X. Deng, Y. Chen, R. Murphy, X. Xiong, B. Song, C. Wong, M. Wang, *Adv. Energy Mater.* 2018, **8**, 1702247.
- 10 B.Z. Chen, Y. Qin, D. Weng, Q. Xiao, Y. Peng, X. Wang, H. Li, F. Wei, Y. Lu, *Adv. Funct. Mater.* 2009, **19**, 3420–3426.
- 11 Z. Wu, W. Ren, D. Wang, F. Li, B. Liu, H. Cheng, *ACS Nano*. 2010, **4**, 5835–5842.
- 12 Y. Zhao, W. Ran, J. He, Y. Huang, Z. Liu, W. Liu, *Small*. 2015, **11**, 1310–1319.
- 13 Y. Zhang, D. Losic, *J. Mater. Chem. A*, 2017, **5**, 10856–10865.
- 14 P. Wang, S. Sun, S. Wang, Y. Zhang, G. Zhang, *J Appl Electrochem*. 2017, **47**, 1293–1303.
- 15 J. Chang, M. Jin, F. Yao, T. Kim, V. Le, H. Yue, F. Gunes, B. Li, A. Ghosh, S. Xie, Y. Lee, *Adv. Funct. Mater.* 2013, **23**, 5074–5083.
- 16 F. Grote, Y. Lei, *Nano Energy*. 2014, **10**, 63–70.
